# Supplementary material
Source: publisher site journal article supplement (https://www.dovepress.com/article/407368)
Supplement: Supplementary file 1 [file get_supplementary_file.php]

| **Supplemental** **Table 1** Demographics of patients | | | |
| --- | --- | --- | --- |
|  | NC group | AR group | P value |
| Sample size | 24 | 45 |  |
| Gender, male/female | 11(45.8%)/13(54.12%) | 28(62.2%)/17(37.8%) | 0.191 |
| Age, years | 40.7±13.3 | 37.1±15.0 | 0.725 |
| NC: Normal control group; AR: allergic rhinitis group . Median (P25-P75).*p*>0.05 means no significant.  **Supplemental** **Table** **2** Distribution of Patients’ Allergen Test   | s-IgE Positive | NC (n=24) | AR (n=45) | | --- | --- | --- | | phad | 0 | 17(37.78%) | | d1 | 0 | 14(31.11%) | | d2 | 0 | 12(26.67%) | | ex1 | 0 | 7(15.56%) | | wx5 | 0 | 6(13.34%) | | tx5 | 0 | 6(13.34%) | | fx5 | 0 | 5(11.11%) | | fx1 | 0 | 5(11.11%) | | w6 | 0 | 4(8.89%) | | f24 | 0 | 2(4.44%) | | w22 | 0 | 2(4.44%) | | w1 | 0 | 1(2.22%) | | f23 | 0 | 1(2.22%) |  | NC: Normal control group; AR: allergic rhinitis group .Concentration≥ 0.35kUA/L indicated allergen sensitization and postive;phadiatop: inhaled allergen;d1: house dust mite; d2: Dermatophagoides farina; ex1:animal fur dander;wx5:weed mix;tx5:poplar, hazel, elm and willow;fx5: protein, milk, cod, wheat, peanut, soybean; fx1: peanut, hazelnut, Brazil nut, almond, coconut;w6:artemisia argyi; f24:shrimp; w22:scandent hop; w1:ragweed; f23:crab. **Supplementary Table 3** The primer sequences for Real-Time PCR  |  | Mouse | Human | | --- | --- | --- | | IL4-F | GGTCTCAACCCCCAGCTAGT | CCAACTGCTTCCCCCTCTG | | IL4-R | GCCGATGATCTCTCTCAAGTGAT | TCTGTTACGGTCAACTCGGTG | | IL5-F | GCAATGAGACGATGAGGCTTC | TGGAGCTGCCTACGTGTATG | | IL5-R | GCCCCTGAAAGATTTCTCCAATG | TTCGATGAGTAGAAAGCAGTGC | | IL13-F | TGAGCAACATCACACAAGACC | CCTCATGGCGCTTTTGTTGAC | | IL13-R | GGCCTTGCGGTTACAGAGG | TCTGGTTCTGGGTGATGTTGA | | BDNF-F | TCATACTTCGGTTGCATGAAGG | GGCTTGACATCATTGGCTGAC | | BDNF-R | ACACCTGGGTAGGCCAAGTT | CATTGGGCCGAACTTTCTGGT | | GAPDH-F | AGGTCGGTGTGAACGGATTTG | GCACCGTCAAGGCTGAGAAC | | GAPDH-R | GGGGTCGTTGATGGCAACA | TGGTGAAGACGCCAGTGGA | | | --- | --- | --- | --- | --- | --- | --- | --- | --- | --- | --- | --- | --- | --- | --- | --- | --- | --- | --- | --- | --- | --- | --- | --- | --- | --- | --- | --- | --- | --- | --- | --- | --- | --- | | | | |
